# Supplementary material for: Antibiotic-Antiapoptotic Dual Function of Clinacanthus nutans (Burm. f.) Lindau Leaf Extracts against Bovine Mastitis
Source: Antibiotics (Basel). 2020 Jul 21;9(7):429. doi: 10.3390/antibiotics9070429 (PMC7400556; doi:10.3390/antibiotics9070429)
Supplement: Supplementary file 1 [file antibiotics-09-00429-s001.pdf]

## Supplementary Figures

**Figure S1 Cytotoxicity of *C.nutans* extract fractions** The various concentrations of the herb extracts were tested for cytotoxicity to CPAE cells using prestoBLUE™ cell viability reagent (Invitrogen, MA, USA). The viability at 24 hours after treatment was calculated relative to that of non-treatment control.

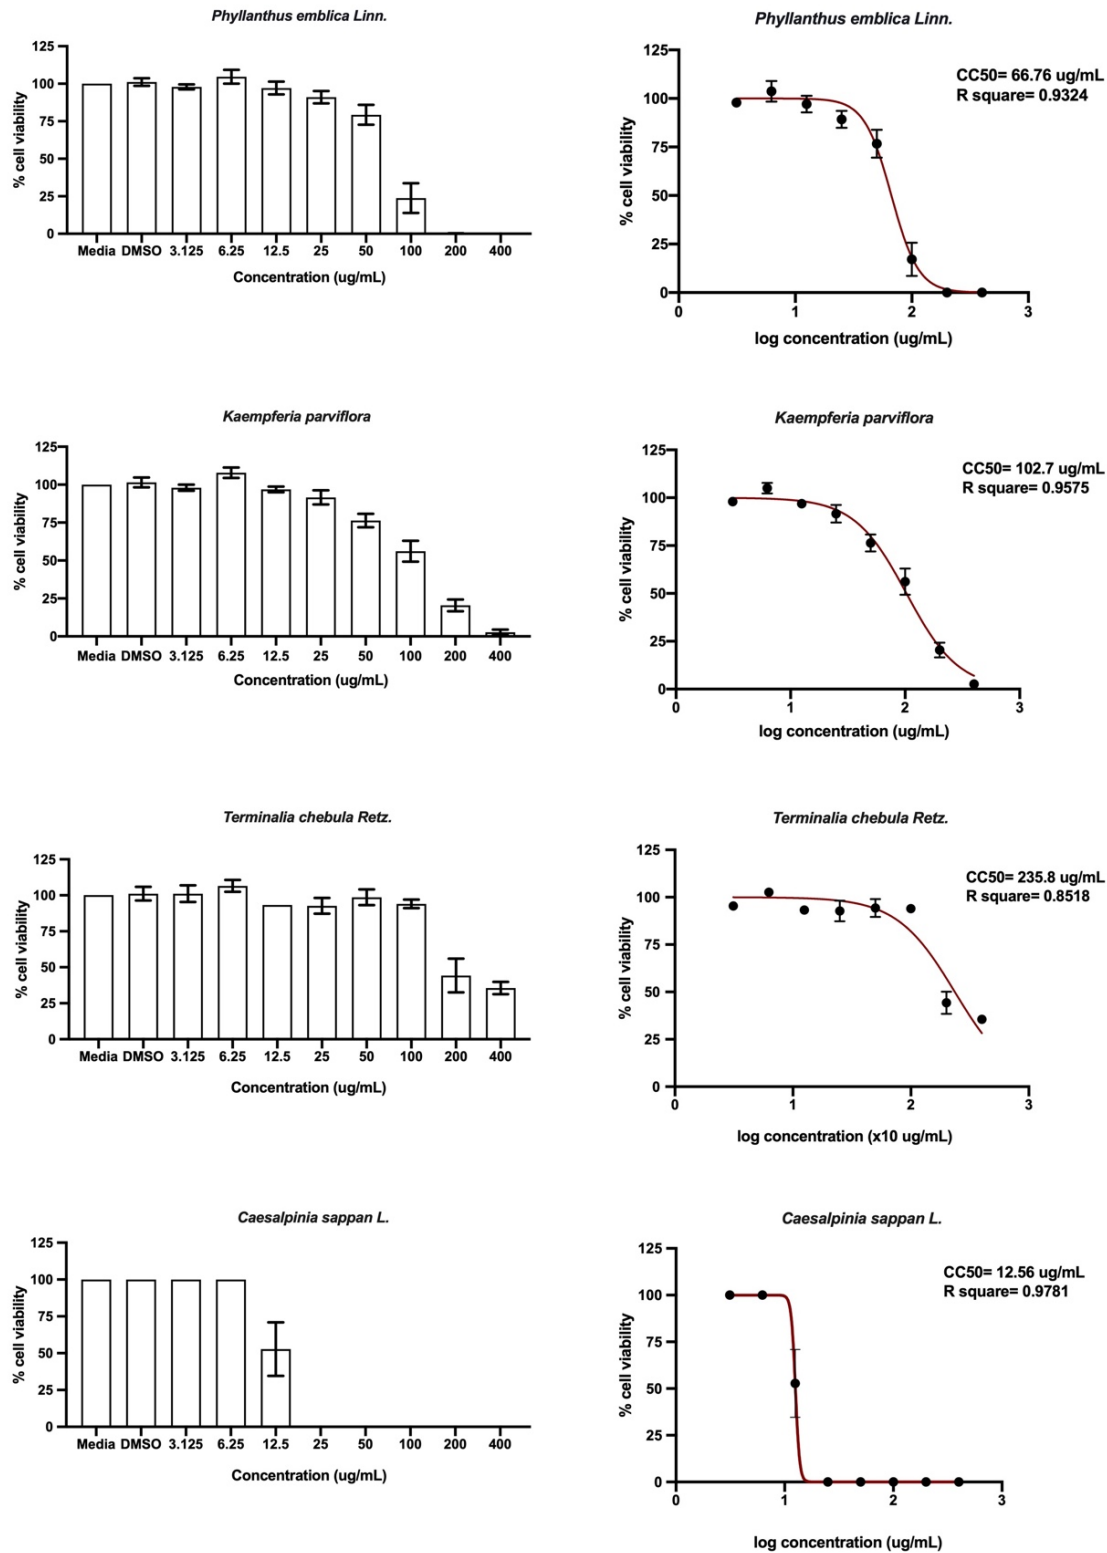

**Figure S1 (Continue) Cytotoxicity of *C.nutans* extract fractions** The various concentrations of the herb extracts were tested for cytotoxicity to CPAE cells using prestoBLUE™ cell viability reagent (Invitrogen, MA, USA). The viability at 24 hours after treatment was calculated relative to that of non-treatment control.

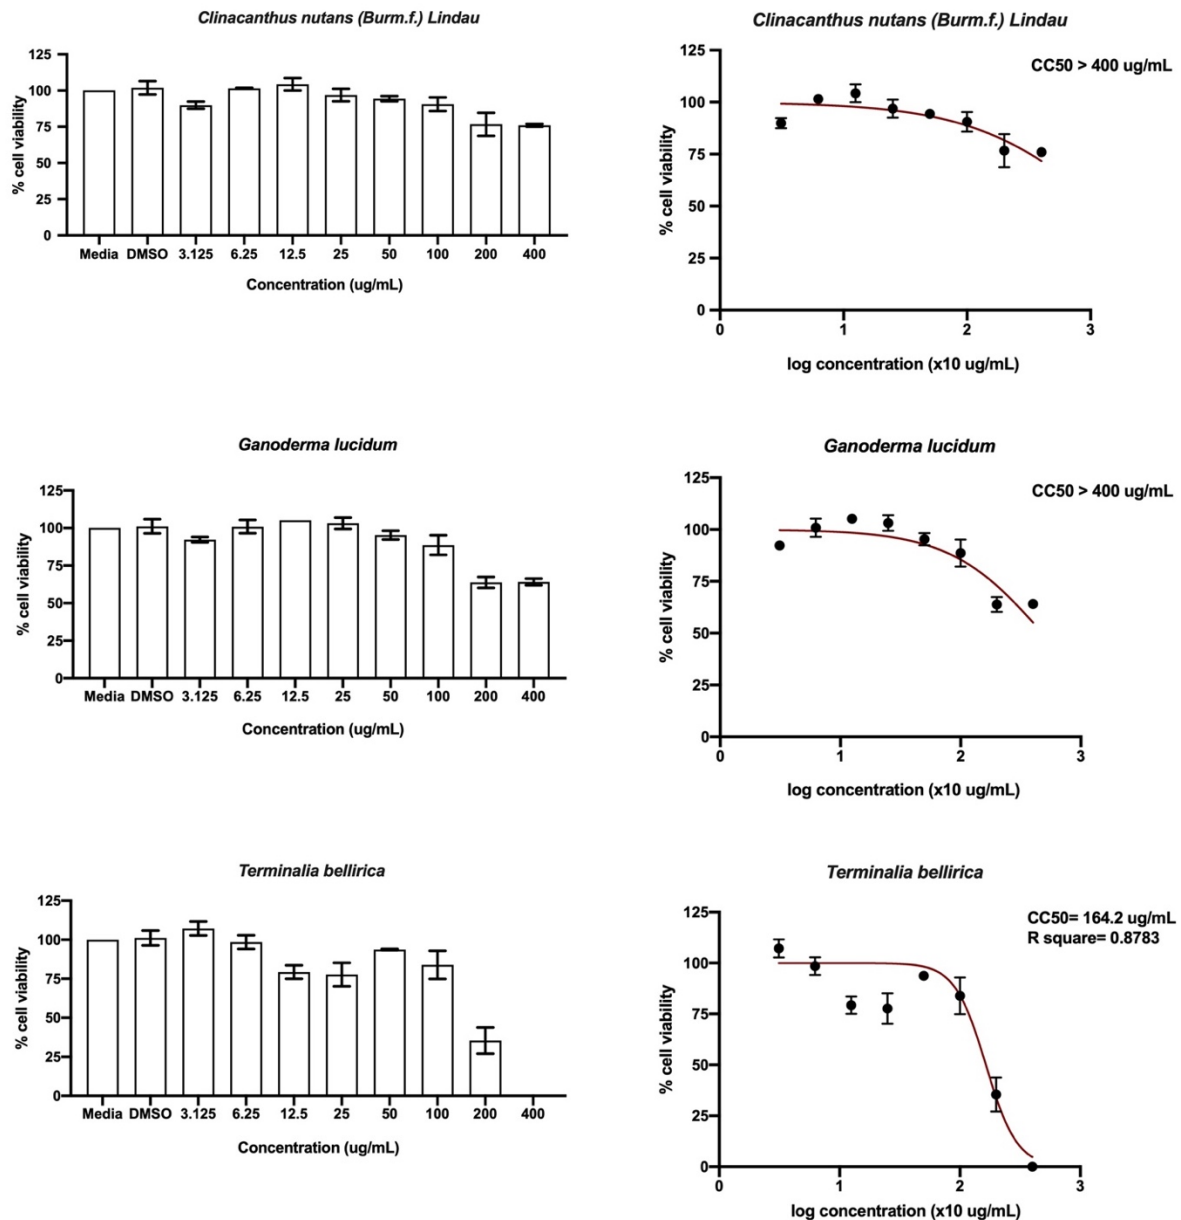

**Figure S2 Antiapoptotic activity of *C. nutans* by TUNEL assay.** The mode of action of the extract to manipulate apoptosis in LPS-treated cells was confirmed by staining fragmented DNA by TUNEL assay.

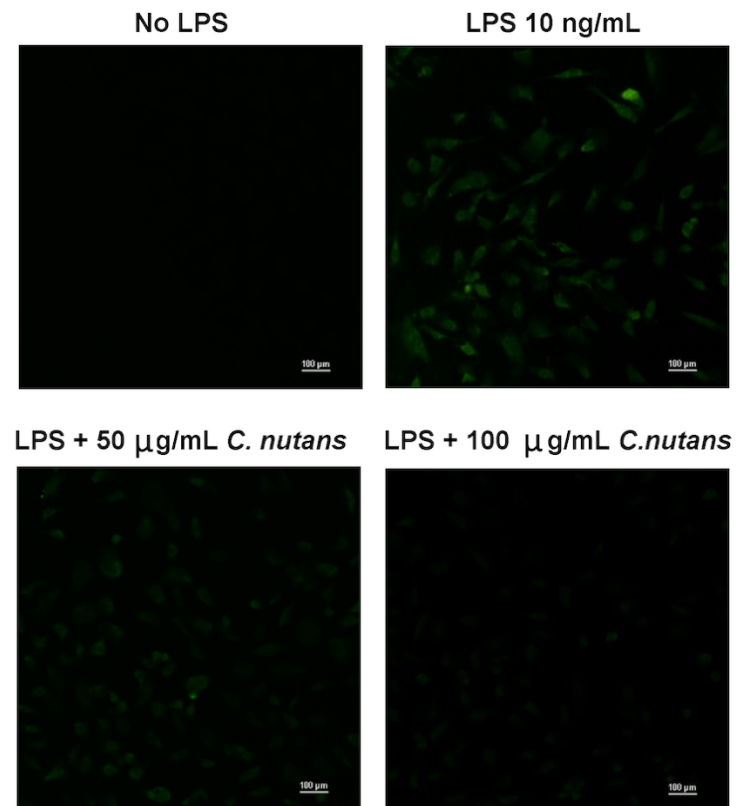

**Figure S3 Antiapoptotic activities of *C. nutans* fractions** The changes in cell morphology upon LPS treatment in presence or absence of extract fractions were observed under the microscope.

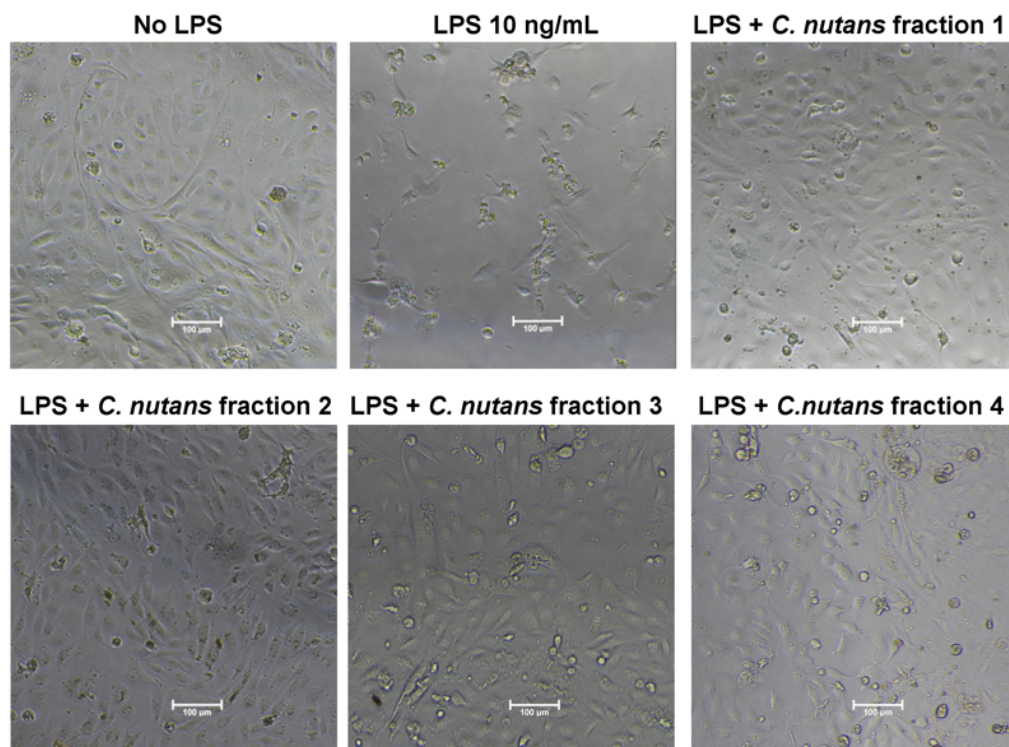

**Figure S4 HPLC profile** *C.nutrans* extract fractions including hexane (fraction 1), dichloromethane (fraction 2), ethyl acetate (fraction 3), and water (fraction 4) were analysed using HPLC

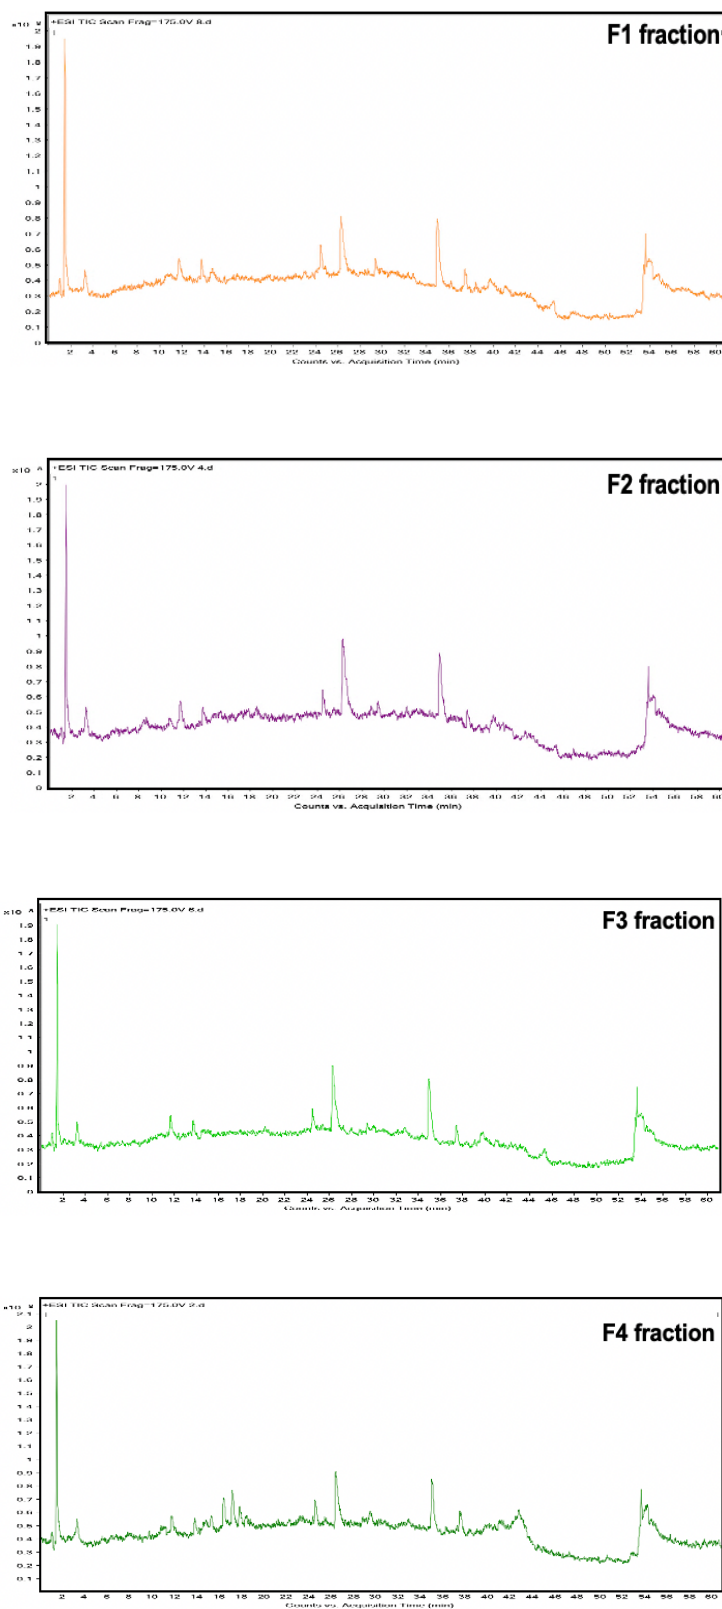

**Figure S5 LC-MS/MS analysis of fraction 1** LC-MS/MS data result of hexane fraction (fraction 1) presented three highlighted overlapped components; glyceryl 1,3-distearate ( $C_{39}H_{76}O_5$ ), kaempferol 3-O-feruloyl-sophoroside 7-O-glucoside ( $C_{43}H_{48}O_{24}$  and hydroxyphthioceranic acid ( $C_{46}H_{92}O_3$ ).

**Compound Table**

| Compound Label                                                                                                                   | RT     | Mass     | Name                                                                                               | DB Formula          | DB Diff (ppm) | Hits (DB) |
|----------------------------------------------------------------------------------------------------------------------------------|--------|----------|----------------------------------------------------------------------------------------------------|---------------------|---------------|-----------|
| Cpd 3: Perindoprilat; C17 H28 N2 O5; 1.522                                                                                       | 1.522  | 340.2002 | Perindoprilat                                                                                      | C17 H28 N2 O5       | -1.13         | 1         |
| Cpd 7: Furo[3,4-b]pyridine-3-carboxylic acid, 5,7-dihydro-2-methyl-4-(2-nitrophenyl)-5-oxo-, methyl ester; C16 H12 N2 O6; 10.738 | 10.738 | 328.0698 | Furo[3,4-b]pyridine-3-carboxylic acid, 5,7-dihydro-2-methyl-4-(2-nitrophenyl)-5-oxo-, methyl ester | C16 H12 N2 O6       | -0.69         | 1         |
| Cpd 51: Chrysoeriol 7-O-(6"-malonyl-glucoside); C25 H24 O14; 14.522                                                              | 14.522 | 548.1157 | Chrysoeriol 7-O-(6"-malonyl-glucoside)                                                             | C25 H24 O14         | 1.58          | 8         |
| Cpd 60: Debromoaplysiatoxin; C32 H48 O10; 15.001                                                                                 | 15.001 | 592.3234 | Debromoaplysiatoxin                                                                                | C32 H48 O10         | 2.29          | 1         |
| Cpd 66: Neoliquiritin 2"-apioside; C26 H30 O13; 15.239                                                                           | 15.239 | 550.1677 | Neoliquiritin 2"-apioside                                                                          | C26 H30 O13         | 1.64          | 8         |
| Cpd 260: Yuccaol C; C30 H22 O10; 26.555                                                                                          | 26.555 | 542.1212 | Yuccaol C                                                                                          | C30 H22 O10         | 0.18          | 3         |
| Cpd 261: Isonoetheaflavin; C29 H24 O12; 26.556                                                                                   | 26.556 | 564.1266 | Isonoetheaflavin                                                                                   | C29 H24 O12         | 0.38          | 6         |
| Cpd 360: PG(O-18:0/22:0); C46 H93 O9 P; 32.307                                                                                   | 32.307 | 820.6564 | PG(O-18:0/22:0)                                                                                    | C46 H93 O9 P        | -0.89         | 10        |
| Cpd 361: ergosta-3beta,5alpha,6beta,25-tetrol; C28 H50 O4; 32.314                                                                | 32.314 | 450.3718 | ergosta-3beta,5alpha,6beta,25-tetrol                                                               | C28 H50 O4          | -2.01         | 2         |
| Cpd 467: Salpha-Ethoxy-6beta-hydroxy-5,6-dihydrophysalin B; C30 H36 O11; 36.047                                                  | 36.047 | 572.2247 | Salpha-Ethoxy-6beta-hydroxy-5,6-dihydrophysalin B                                                  | C30 H36 O11         | 1.92          | 1         |
| Cpd 516: Mebendazole; C16 H13 N3 O3; 36.777                                                                                      | 36.777 | 295.0968 | Mebendazole                                                                                        | C16 H13 N3 O3       | -3.8          | 1         |
| Cpd 520: Hydroxyphthioceranic acid (C46); C46 H92 O3; 36.825                                                                     | 36.825 | 692.7054 | Hydroxyphthioceranic acid (C46)                                                                    | C46 H92 O3          | -1.14         | 1         |
| Cpd 524: DG(18:1(11Z)/22:4(7Z,10Z,13Z,16Z)/0:0); C43 H74 O5; 36.922                                                              | 36.922 | 670.5546 | DG(18:1(11Z)/22:4(7Z,10Z,13Z,16Z)/0:0)                                                             | C43 H74 O5          | -1.52         | 10        |
| Cpd 556: 3'-Deoxyoleacein; C17 H20 O5; 37.249                                                                                    | 37.249 | 304.1321 | 3'-Deoxyoleacein                                                                                   | C17 H20 O5          | -3.39         | 5         |
| Cpd 581: Nocardin F; C19 H17 N3 O7; 37.440                                                                                       | 37.44  | 399.1067 | Nocardin F                                                                                         | C19 H17 N3 O7       | -0.2          | 2         |
| Cpd 649: 6-Geranylgeranyl 8'-methyl 6,8'-diapocarotene-6,8'-dioate; C43 H60 O4; 38.702                                           | 38.702 | 640.4485 | 6-Geranylgeranyl 8'-methyl 6,8'-diapocarotene-6,8'-dioate                                          | C43 H60 O4          | 1.01          | 1         |
| Cpd 717: (23S)-23,25-dihydroxy-24-oxovitamine D3 23-(beta-glucuronide); C33 H50 O10; 39.653                                      | 39.653 | 606.3399 | (23S)-23,25-dihydroxy-24-oxovitamine D3 23-(beta-glucuronide)                                      | C33 H50 O10         | 0.85          | 3         |
| Cpd 758: Lys Pro Trp; C22 H31 N5 O4; 40.089                                                                                      | 40.089 | 429.2389 | Lys Pro Trp                                                                                        | C22 H31 N5 O4       | -2.98         | 6         |
| Cpd 827: Cyclohex-1,4-diene-1-carboxyl-CoA; C28 H42 N7 O17 P3 S; 41.199                                                          | 41.199 | 873.1565 | Cyclohex-1,4-diene-1-carboxyl-CoA                                                                  | C28 H42 N7 O17 P3 S | 0.66          | 3         |
| Cpd 863: Kaempferol 3-(2-feruloylsophoroside) 7-glucoside; C43 H48 O24; 42.052                                                   | 42.052 | 948.255  | Kaempferol 3-(2-feruloylsophoroside) 7-glucoside                                                   | C43 H48 O24         | -1.57         | 10        |
| Cpd 880: PG(17:1(9Z)/12:0); C35 H67 O10 P; 42.356                                                                                | 42.356 | 678.4481 | PG(17:1(9Z)/12:0)                                                                                  | C35 H67 O10 P       | -1.41         | 9         |
| Cpd 890: Ganoderic acid Mc; C36 H54 O9; 42.649                                                                                   | 42.649 | 630.3797 | Ganoderic acid Mc                                                                                  | C36 H54 O9          | -4.63         | 4         |
| Cpd 962: Ephedrannin A; C30 H20 O11; 44.407                                                                                      | 44.407 | 556.0995 | Ephedrannin A                                                                                      | C30 H20 O11         | 1.82          | 1         |
| Cpd 1011: DG(22:0/14:0/0:0); C39 H76 O5; 48.236                                                                                  | 48.236 | 624.5704 | DG(22:0/14:0/0:0)                                                                                  | C39 H76 O5          | -1.88         | 10        |

**Figure S6 LC-MS/MS analysis of fraction 2** LC-MS/MS data result of dichloromethane fraction (fraction 2) presented three highlighted overlapped components; glyceryl 1,3-distearate ( $C_{39}H_{76}O_5$ ), kaempferol 3-O-feruloyl-sophoroside 7-O-glucoside ( $C_{43}H_{48}O_{24}$  and hydroxyphthioceranic acid ( $C_{46}H_{92}O_3$ ).

**Compound Table**

| Compound Label                                                                                                        | RT     | Mass     | Name                                                                                     | DB Formula          | DB Diff (ppm) | Hits (DB) |
|-----------------------------------------------------------------------------------------------------------------------|--------|----------|------------------------------------------------------------------------------------------|---------------------|---------------|-----------|
| Cpd 1: V-PYRRO/NO; C6 H11 N3 O2; 1.024                                                                                | 1.024  | 157.0849 | V-PYRRO/NO                                                                               | C6 H11 N3 O2        | 1.74          | 6         |
| Cpd 30: Glucosyl (2E,6E,10x)-10,11-dihydroxy-2,6-farnesadienoate; C21 H36 O9; 12.743                                  | 12.743 | 432.2375 | Glucosyl (2E,6E,10x)-10,11-dihydroxy-2,6-farnesadienoate                                 | C21 H36 O9          | -3.58         | 1         |
| Cpd 63: Amitrole; C2 H4 N4; 14.673                                                                                    | 14.673 | 84.0439  | Amitrole                                                                                 | C2 H4 N4            | -3.5          | 1         |
| Cpd 68: Debromopysiatosin; C32 H48 O10; 14.967                                                                        | 14.967 | 592.3258 | Debromopysiatosin                                                                        | C32 H48 O10         | -1.71         | 2         |
| Cpd 79: Neoliquiritin 2"-apioside; C26 H30 O13; 15.206                                                                | 15.206 | 550.1681 | Neoliquiritin 2"-apioside                                                                | C26 H30 O13         | 1             | 8         |
| Cpd 277: Eprosartan; C23 H24 N2 O4 S; 21.461                                                                          | 21.461 | 424.1463 | Eprosartan                                                                               | C23 H24 N2 O4 S     | -1.51         | 1         |
| Cpd 286: Hispidulin 7-(6"-E-p-Coumaroyl)glucoside; C31 H28 O13; 22.182                                                | 22.182 | 608.1547 | Hispidulin 7-(6"-E-p-Coumaroyl)glucoside                                                 | C31 H28 O13         | -2.83         | 4         |
| Cpd 297: Hispidulin 7-(6"-E-p-Coumaroyl)glucoside; C31 H28 O13; 23.049                                                | 23.049 | 608.1536 | Hispidulin 7-(6"-E-p-Coumaroyl)glucoside                                                 | C31 H28 O13         | -0.96         | 4         |
| Cpd 299: Coroloxide; C35 H54 O12; 23.208                                                                              | 23.208 | 666.3617 | Coroloxide                                                                               | C35 H54 O12         | -0.28         | 1         |
| Cpd 349: Albufuran C; C34 H28 O9; 26.551                                                                              | 26.551 | 580.1742 | Albufuran C                                                                              | C34 H28 O9          | -1.58         | 2         |
| Cpd 351: Yuccaol C; C30 H22 O10; 26.561                                                                               | 26.561 | 542.1224 | Yuccaol C                                                                                | C30 H22 O10         | -2.1          | 3         |
| Cpd 352: Isonoeheafavin; C29 H24 O12; 26.563                                                                          | 26.563 | 564.1278 | Isonoeheafavin                                                                           | C29 H24 O12         | -1.81         | 4         |
| Cpd 477: Huratoin; C34 H48 O8; 32.613                                                                                 | 32.613 | 584.3364 | Huratoin                                                                                 | C34 H48 O8          | -2.45         | 4         |
| Cpd 482: Gancanoin H; C25 H24 O6; 32.794                                                                              | 32.794 | 420.1579 | Gancanoin H                                                                              | C25 H24 O6          | -1.56         | 10        |
| Cpd 504: Armillane; C23 H32 O7; 33.774                                                                                | 33.774 | 420.2159 | Armillane                                                                                | C23 H32 O7          | -2.71         | 1         |
| Cpd 558: N-cis-Feruloyltyramine; C18 H19 N O4; 35.790                                                                 | 35.79  | 313.1319 | N-cis-Feruloyltyramine                                                                   | C18 H19 N O4        | -1.7          | 10        |
| Cpd 620: Tyrosyl-Asparagine; C13 H17 N3 O5; 36.745                                                                    | 36.745 | 295.1173 | Tyrosyl-Asparagine                                                                       | C13 H17 N3 O5       | -1.58         | 7         |
| Cpd 624: Hydroxyphthioceranic acid (C46); C46 H92 O3; 36.819                                                          | 36.819 | 692.7026 | Hydroxyphthioceranic acid (C46)                                                          | C46 H92 O3          | 2.98          | 1         |
| Cpd 630: DG(18:1(11Z)/20:1(11Z)/0:0); C41 H76 O5; 36.919                                                              | 36.919 | 648.5703 | DG(18:1(11Z)/20:1(11Z)/0:0)                                                              | C41 H76 O5          | -1.58         | 10        |
| Cpd 636: 3-Epipapryferic acid; C35 H56 O8; 37.014                                                                     | 37.014 | 604.3994 | 3-Epipapryferic acid                                                                     | C35 H56 O8          | -3.1          | 3         |
| Cpd 637: Ginsenoside Rh4; C36 H60 O8; 37.028                                                                          | 37.028 | 620.4292 | Ginsenoside Rh4                                                                          | C36 H60 O8          | -0.59         | 4         |
| Cpd 661: TG(12:0/13:0/14:1(9Z))[iso6]; C42 H78 O6; 37.225                                                             | 37.225 | 678.581  | TG(12:0/13:0/14:1(9Z))[iso6]                                                             | C42 H78 O6          | -1.69         | 2         |
| Cpd 669: 1a,25-dihydroxy-26,27-dimethylvitamin D3 / 1a,25-dihydroxy-26,27-dimethylcholecalciferol; C29 H48 O3; 37.380 | 37.38  | 444.3608 | 1a,25-dihydroxy-26,27-dimethylvitamin D3 / 1a,25-dihydroxy-26,27-dimethylcholecalciferol | C29 H48 O3          | -1.06         | 10        |
| Cpd 750: Dihydromorelloflavone; C30 H22 O11; 38.409                                                                   | 38.409 | 558.1169 | Dihydromorelloflavone                                                                    | C30 H22 O11         | -1.17         | 2         |
| Cpd 768: Yuccaol C; C30 H22 O10; 38.627                                                                               | 38.627 | 542.1209 | Yuccaol C                                                                                | C30 H22 O10         | 0.78          | 3         |
| Cpd 772: PA(P-18:0/13:0); C34 H67 O7 P; 38.691                                                                        | 38.691 | 618.4639 | PA(P-18:0/13:0)                                                                          | C34 H67 O7 P        | -2.42         | 3         |
| Cpd 789: UDP-N-acetyl-6-(D-galactose-1-phospho)-D-glucosamine; C23 H38 N3 O25 P3; 38.977                              | 38.977 | 849.1006 | UDP-N-acetyl-6-(D-galactose-1-phospho)-D-glucosamine                                     | C23 H38 N3 O25 P3   | 0.16          | 1         |
| Cpd 836: Huratoin; C34 H48 O8; 39.651                                                                                 | 39.651 | 584.3365 | Huratoin                                                                                 | C34 H48 O8          | -2.62         | 3         |
| Cpd 869: Absciscic alcohol 11-glucoside; C21 H32 O8; 40.082                                                           | 40.082 | 412.2105 | Abciscic alcohol 11-glucoside                                                            | C21 H32 O8          | -1.98         | 2         |
| Cpd 927: Cyclohex-1,4-diene-1-carboxyl-CoA; C28 H42 N7 O17 P3 S; 41.205                                               | 41.205 | 873.1573 | Cyclohex-1,4-diene-1-carboxyl-CoA                                                        | C28 H42 N7 O17 P3 S | -0.3          | 3         |
| Cpd 955: Kaempferol 3-(2-feruloylsophoroside) 7-glucoside; C43 H48 O24; 42.034                                        | 42.034 | 948.2513 | Kaempferol 3-(2-feruloylsophoroside) 7-glucoside                                         | C43 H48 O24         | 2.33          | 10        |
| Cpd 956: PA(18:0/14:1(9Z)); C35 H67 O8 P; 42.076                                                                      | 42.076 | 646.4576 | PA(18:0/14:1(9Z))                                                                        | C35 H67 O8 P        | -0.33         | 10        |
| Cpd 969: Dapiprazole; C19 H27 N5; 42.386                                                                              | 42.386 | 325.227  | Dapiprazole                                                                              | C19 H27 N5          | -1.05         | 9         |
| Cpd 976: Ganoderic acid Mc; C36 H54 O9; 42.647                                                                        | 42.647 | 630.3769 | Ganoderic acid Mc                                                                        | C36 H54 O9          | -0.17         | 4         |
| Cpd 987: Dofetilide; C19 H27 N3 O5 S2; 42.689                                                                         | 42.689 | 441.1396 | Dofetilide                                                                               | C19 H27 N3 O5 S2    | -0.86         | 2         |
| Cpd 1075: 5-Hydroxy-7-methoxy-2-tritriacetyl-4H-1-benzopyran-4-one; C43 H74 O4; 46.602                                | 46.602 | 654.5593 | 5-Hydroxy-7-methoxy-2-tritriacetyl-4H-1-benzopyran-4-one                                 | C43 H74 O4          | -0.9          | 1         |
| Cpd 1090: Guttiferone A; C38 H50 O6; 48.211                                                                           | 48.211 | 602.3627 | Guttiferone A                                                                            | C38 H50 O6          | -3.24         | 4         |
| Cpd 1116: His Gln His; C17 H24 N8 O5; 53.345                                                                          | 53.345 | 420.188  | His Gln His                                                                              | C17 H24 N8 O5       | -2.42         | 4         |

**Figure S7 LC-MS/MS analysis of fraction 3** LC-MS/MS data result of ethyl acetate fraction (fraction 3) presented three highlighted overlapped components; glyceryl 1,3-disterate ( $C_{39}H_{76}O_5$ ), kaempferol 3-O-feruloyl-sophoroside 7-O-glucoside ( $C_{43}H_{48}O_{24}$  and hydroxyphthioceranic acid ( $C_{46}H_{92}O_3$ ).

**Compound Table**

| Compound Label                                                                                                        | RT     | Mass     | Name                                                                                     | DB Formula          | DB Diff (ppm) | Hits (DB) |
|-----------------------------------------------------------------------------------------------------------------------|--------|----------|------------------------------------------------------------------------------------------|---------------------|---------------|-----------|
| Cpd 65: Debromoaplysiatoxin; C32 H48 O10; 14.968                                                                      | 14.968 | 592.3237 | Debromoaplysiatoxin                                                                      | C32 H48 O10         | 1.84          | 1         |
| Cpd 75: Neoliquiritin 2"-apioside; C26 H30 O13; 15.207                                                                | 15.207 | 550.1685 | Neoliquiritin 2"-apioside                                                                | C26 H30 O13         | 0.22          | 8         |
| Cpd 280: Yuccaol C; C30 H22 O10; 26.553                                                                               | 26.553 | 542.1223 | Yuccaol C                                                                                | C30 H22 O10         | -1.77         | 3         |
| Cpd 281: Isonoetheaflavin; C29 H24 O12; 26.554                                                                        | 26.554 | 564.1276 | Isonoetheaflavin                                                                         | C29 H24 O12         | -1.46         | 4         |
| Cpd 382: Gancaonin H; C25 H24 O6; 32.777                                                                              | 32.777 | 420.1581 | Gancaonin H                                                                              | C25 H24 O6          | -1.93         | 10        |
| Cpd 445: Cassitoroside; C25 H32 O14; 36.074                                                                           | 36.074 | 556.1789 | Cassitoroside                                                                            | C25 H32 O14         | 0.5           | 3         |
| Cpd 485: Hydroxyphthioceranic acid (C46); C46 H92 O3; 36.877                                                          | 36.877 | 692.703  | Hydroxyphthioceranic acid (C46)                                                          | C46 H92 O3          | 2.4           | 1         |
| Cpd 489: DG(18:1(11Z)/20:1(11Z)/0:0); C41 H76 O5; 36.976                                                              | 36.976 | 648.5705 | DG(18:1(11Z)/20:1(11Z)/0:0)                                                              | C41 H76 O5          | -1.89         | 10        |
| Cpd 492: Ginsenoside Rh4; C36 H60 O8; 37.072                                                                          | 37.072 | 620.4292 | Ginsenoside Rh4                                                                          | C36 H60 O8          | -0.54         | 4         |
| Cpd 493: 3-Epipapyriferic acid; C35 H56 O8; 37.074                                                                    | 37.074 | 604.3999 | 3-Epipapyriferic acid                                                                    | C35 H56 O8          | -3.97         | 3         |
| Cpd 515: TG(12:0/13:0/14:1(9Z))[iso6]; C42 H78 O6; 37.320                                                             | 37.32  | 678.5808 | TG(12:0/13:0/14:1(9Z))[iso6]                                                             | C42 H78 O6          | -1.44         | 2         |
| Cpd 527: 1a,25-dihydroxy-26,27-dimethylvitamin D3 / 1a,25-dihydroxy-26,27-dimethylcholecalciferol; C29 H48 O3; 37.437 | 37.437 | 444.3603 | 1a,25-dihydroxy-26,27-dimethylvitamin D3 / 1a,25-dihydroxy-26,27-dimethylcholecalciferol | C29 H48 O3          | 0.13          | 10        |
| Cpd 584: Dihydromorelloflavone; C30 H22 O11; 38.475                                                                   | 38.475 | 558.1174 | Dihydromorelloflavone                                                                    | C30 H22 O11         | -2.17         | 2         |
| Cpd 601: Yuccaol C; C30 H22 O10; 38.708                                                                               | 38.708 | 542.1208 | Yuccaol C                                                                                | C30 H22 O10         | 0.85          | 3         |
| Cpd 606: PA(P-18:0/13:0); C34 H67 O7 P; 38.759                                                                        | 38.759 | 618.4644 | PA(P-18:0/13:0)                                                                          | C34 H67 O7 P        | -3.12         | 3         |
| Cpd 611: I-Urobilin; C33 H42 N4 O6; 38.872                                                                            | 38.872 | 590.3107 | I-Urobilin                                                                               | C33 H42 N4 O6       | -0.45         | 2         |
| Cpd 660: Huratoxin; C34 H48 O8; 39.707                                                                                | 39.707 | 584.3364 | Huratoxin                                                                                | C34 H48 O8          | -2.5          | 3         |
| Cpd 693: Absciscic alcohol 11-glucoside; C21 H32 O8; 40.140                                                           | 40.14  | 412.2106 | Absciscic alcohol 11-glucoside                                                           | C21 H32 O8          | -2.09         | 2         |
| Cpd 730: Cyclohex-1,4-diene-1-carboxyl-CoA; C28 H42 N7 O17 P3 S; 41.267                                               | 41.267 | 873.1584 | Cyclohex-1,4-diene-1-carboxyl-CoA                                                        | C28 H42 N7 O17 P3 S | -1.48         | 3         |
| Cpd 761: Kaempferol 3-(2-feruloylsophoroside) 7-glucoside; C43 H48 O24; 42.081                                        | 42.081 | 948.2526 | Kaempferol 3-(2-feruloylsophoroside) 7-glucoside                                         | C43 H48 O24         | 1.04          | 10        |
| Cpd 772: Pavoninin 1; C37 H59 N O9; 42.389                                                                            | 42.389 | 661.4194 | Pavoninin 1                                                                              | C37 H59 N O9        | -0.61         | 9         |
| Cpd 782: Ganoderic acid Mc; C36 H54 O9; 42.671                                                                        | 42.671 | 630.377  | Ganoderic acid Mc                                                                        | C36 H54 O9          | -0.33         | 4         |
| Cpd 786: Dofetilide; C19 H27 N3 O5 S2; 42.711                                                                         | 42.711 | 441.14   | Dofetilide                                                                               | C19 H27 N3 O5 S2    | -1.68         | 2         |
| Cpd 860: 20:3 Sitosteryl ester; C49 H82 O2; 47.123                                                                    | 47.123 | 702.6322 | 20:3 Sitosteryl ester                                                                    | C49 H82 O2          | -1.04         | 6         |
| Cpd 867: DG(15:0/21:0/0:0)[iso2]; C39 H76 O5; 48.271                                                                  | 48.271 | 624.5681 | DG(15:0/21:0/0:0)[iso2]                                                                  | C39 H76 O5          | 1.81          | 8         |

**Figure S8 LC-MS/MS analysis of fraction 4** LC-MS/MS data result of water fraction (fraction 8) presented three highlighted overlapped components; glyceryl 1,3-distearate ( $C_{39}H_{76}O_5$ ), kaempferol 3-O-feruloyl-sophoroside 7-O-glucoside ( $C_{43}H_{48}O_{24}$ ) and hydroxyphthioceranic acid ( $C_{46}H_{92}O_3$ ).

**Compound Table**

| Compound Label                                                                                     | RT     | Mass     | Name                                                                  | DB Formula          | DB Diff (ppm) | Hits (DB) |
|----------------------------------------------------------------------------------------------------|--------|----------|-----------------------------------------------------------------------|---------------------|---------------|-----------|
| Cpd 27: Glucosyl (2E,6E,10x)-10,11-dihydroxy-2,6-farnesadienoate; C21 H36 O9; 12.783               | 12.783 | 432.2355 | Glucosyl (2E,6E,10x)-10,11-dihydroxy-2,6-farnesadienoate              | C21 H36 O9          | 1.09          | 1         |
| Cpd 36: 12,14-Nonacosanedione; C29 H56 O2; 13.775                                                  | 13.775 | 436.4292 | 12,14-Nonacosanedione                                                 | C29 H56 O2          | -2.66         | 7         |
| Cpd 81: Neoliquiritin 2"-apioside; C26 H30 O13; 15.241                                             | 15.241 | 550.1681 | Neoliquiritin 2"-apioside                                             | C26 H30 O13         | 1.06          | 8         |
| Cpd 84: 18:2 Sitosteril ester; C47 H80 O2; 15.374                                                  | 15.374 | 676.6135 | 18:2 Sitosteril ester                                                 | C47 H80 O2          | 3.46          | 4         |
| Cpd 388: Yuccaol C; C30 H22 O10; 26.598                                                            | 26.598 | 542.1226 | Yuccaol C                                                             | C30 H22 O10         | -2.42         | 3         |
| Cpd 389: Isonoetheaflavin; C29 H24 O12; 26.606                                                     | 26.606 | 564.1281 | Isonoetheaflavin                                                      | C29 H24 O12         | -2.3          | 4         |
| Cpd 410: Rhazidigenine Nb-oxide; C19 H26 N2 O2; 28.816                                             | 28.816 | 314.1996 | Rhazidigenine Nb-oxide                                                | C19 H26 N2 O2       | -0.66         | 1         |
| Cpd 457: 6-Oxocyclohex-1-ene-1-carboxyl-CoA; C28 H42 N7 O18 P3 S; 30.483                           | 30.483 | 889.152  | 6-Oxocyclohex-1-ene-1-carboxyl-CoA                                    | C28 H42 N7 O18 P3 S | 0.03          | 1         |
| Cpd 532: Gancaonin H; C25 H24 O6; 32.800                                                           | 32.8   | 420.1589 | Gancaonin H                                                           | C25 H24 O6          | -3.75         | 10        |
| Cpd 607: 1-(8-[5]-ladderane-octanoyl)-2-(8-[3]-ladderane-octanoyl)-sn-glycerol; C43 H68 O4; 35.281 | 35.281 | 648.5129 | 1-(8-[5]-ladderane-octanoyl)-2-(8-[3]-ladderane-octanoyl)-sn-glycerol | C43 H68 O4          | -1.72         | 1         |
| Cpd 678: Cassitoroside; C25 H32 O14; 36.701                                                        | 36.701 | 556.1785 | Cassitoroside                                                         | C25 H32 O14         | 1.34          | 3         |
| Cpd 681: Anastatin B; C21 H14 O7; 36.734                                                           | 36.734 | 378.0748 | Anastatin B                                                           | C21 H14 O7          | -2.36         | 2         |
| Cpd 697: DG(14:1(9Z)/24:1(15Z)/0:0); C41 H76 O5; 36.940                                            | 36.94  | 648.569  | DG(14:1(9Z)/24:1(15Z)/0:0)                                            | C41 H76 O5          | 0.4           | 10        |
| Cpd 703: 3-Epipapryriferic acid; C35 H56 O8; 37.039                                                | 37.039 | 604.398  | 3-Epipapryriferic acid                                                | C35 H56 O8          | -0.79         | 4         |
| Cpd 729: TG(12:0/13:0/14:1(9Z))[iso6]; C42 H78 O6; 37.238                                          | 37.238 | 678.5792 | TG(12:0/13:0/14:1(9Z))[iso6]                                          | C42 H78 O6          | 0.97          | 2         |
| Cpd 832: Dihydromorelloflavone; C30 H22 O11; 38.414                                                | 38.414 | 558.1163 | Dihydromorelloflavone                                                 | C30 H22 O11         | -0.1          | 2         |
| Cpd 858: PA(P-18:0/13:0); C34 H67 O7 P; 38.703                                                     | 38.703 | 618.4632 | PA(P-18:0/13:0)                                                       | C34 H67 O7 P        | -1.26         | 3         |
| Cpd 926: Huratoxin; C34 H48 O8; 39.655                                                             | 39.655 | 584.335  | Huratoxin                                                             | C34 H48 O8          | -0.13         | 4         |
| Cpd 962: Absciscic alcohol 11-glucoside; C21 H32 O8; 40.084                                        | 40.084 | 412.2098 | Absciscic alcohol 11-glucoside                                        | C21 H32 O8          | -0.21         | 2         |
| Cpd 985: Botryococcene; C34 H58; 40.555                                                            | 40.555 | 466.4555 | Botryococcene                                                         | C34 H58             | -3.53         | 2         |
| Cpd 1007: Cyclohex-1,4-diene-1-carboxyl-CoA; C28 H42 N7 O17 P3 S; 41.222                           | 41.222 | 873.1558 | Cyclohex-1,4-diene-1-carboxyl-CoA                                     | C28 H42 N7 O17 P3 S | 1.44          | 3         |
| Cpd 1163: Guttiferone A; C38 H50 O6; 48.199                                                        | 48.199 | 602.3624 | Guttiferone A                                                         | C38 H50 O6          | -2.82         | 4         |
| Cpd 1165: Faradiol laurate; C42 H72 O3; 48.223                                                     | 48.223 | 624.5495 | Faradiol laurate                                                      | C42 H72 O3          | -2.16         | 1         |
